# Supplementary material
Source: PubMed Central journal article supplement (PMC3306877)
Supplement: npp2011301x2.pdf [file npp2011301x2.pdf]

## SUPPLEMENTARY FIGURE 2

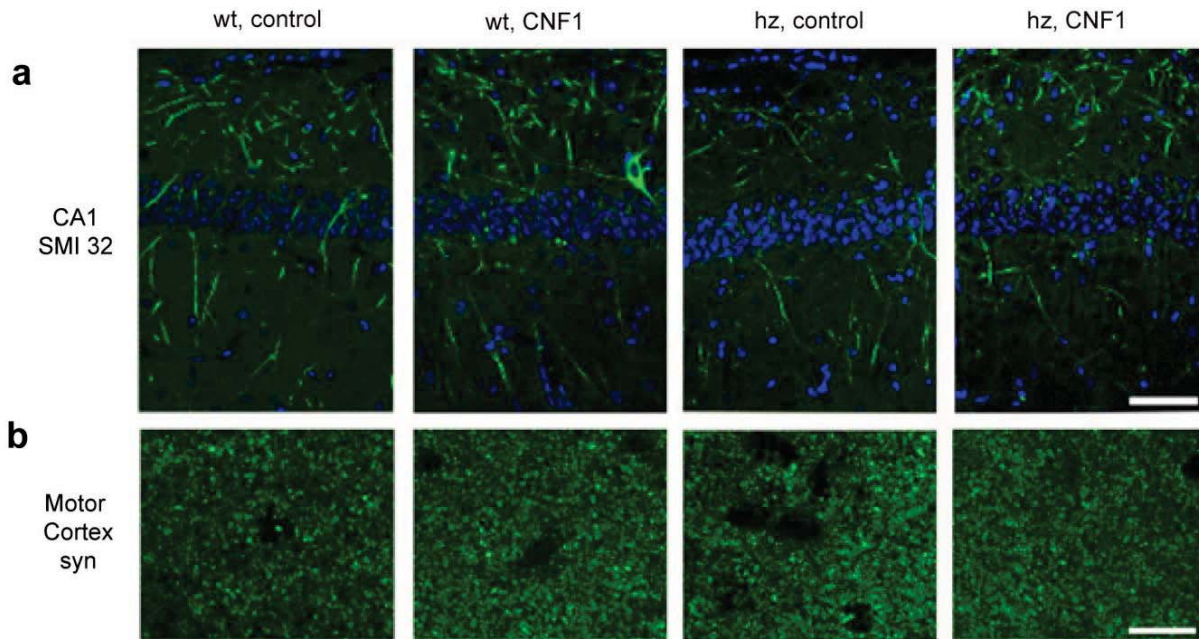

**Figure S2** *Characterization of dendritic tree and synapses in mouse brains did not highlight genotype or treatment effects.* Twenty- $\mu\text{m}$ , free-floating cryosections were immunostained with SMI32 (green) and anti-synaptophysin (green). In SMI32-labelled sections, nuclei were counterstained with Hoechst 33258 (blue). In CA1, SMI32-positive dendrites were similarly labelled in both genotypes, treated or not with CNF1. Bar = 50  $\mu\text{m}$ . In parietal cortex, neither genotype nor CNF1 treatment affected synaptophysin reactivity in layer I, showing no changes in synapse density. Bar = 15  $\mu\text{m}$ .
