# Supplementary material
Source: PubMed Central journal article supplement (PMC3306877)
Supplement: npp2011301x3.pdf [file npp2011301x3.pdf]

### SUPPLEMENTARY FIGURE 3

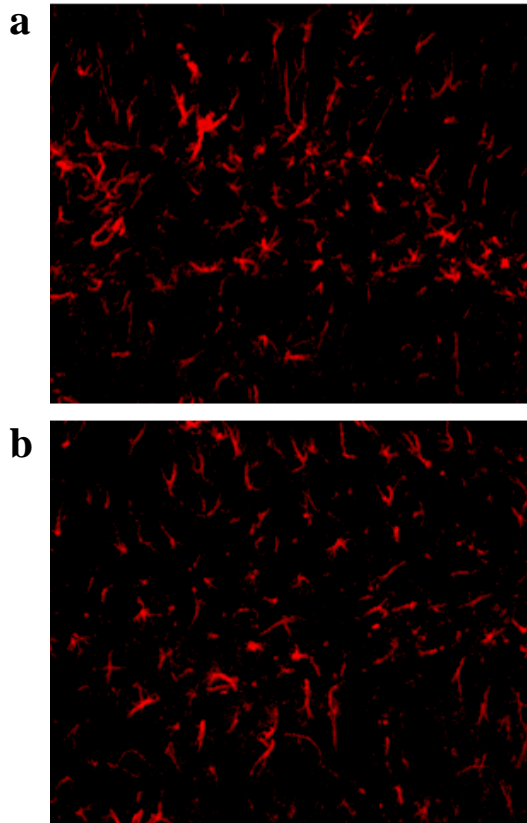

**Figure S3** *Volume of icv injections (2  $\mu$ l) does not elicit astrocytic responses per se.* Based on subjective evaluation, it does not appear that there is a significant effect in GFAP immunolabeling between mice who received the needle placement only (a) or the injection of 2  $\mu$ l of vehicle (b). The experiment was repeated three times with similar results.
