# Supplementary material
Source: PubMed Central journal article supplement (PMC3306877)
Supplement: npp2011301x4.pdf [file npp2011301x4.pdf]

## SUPPLEMENTARY FIGURE 4

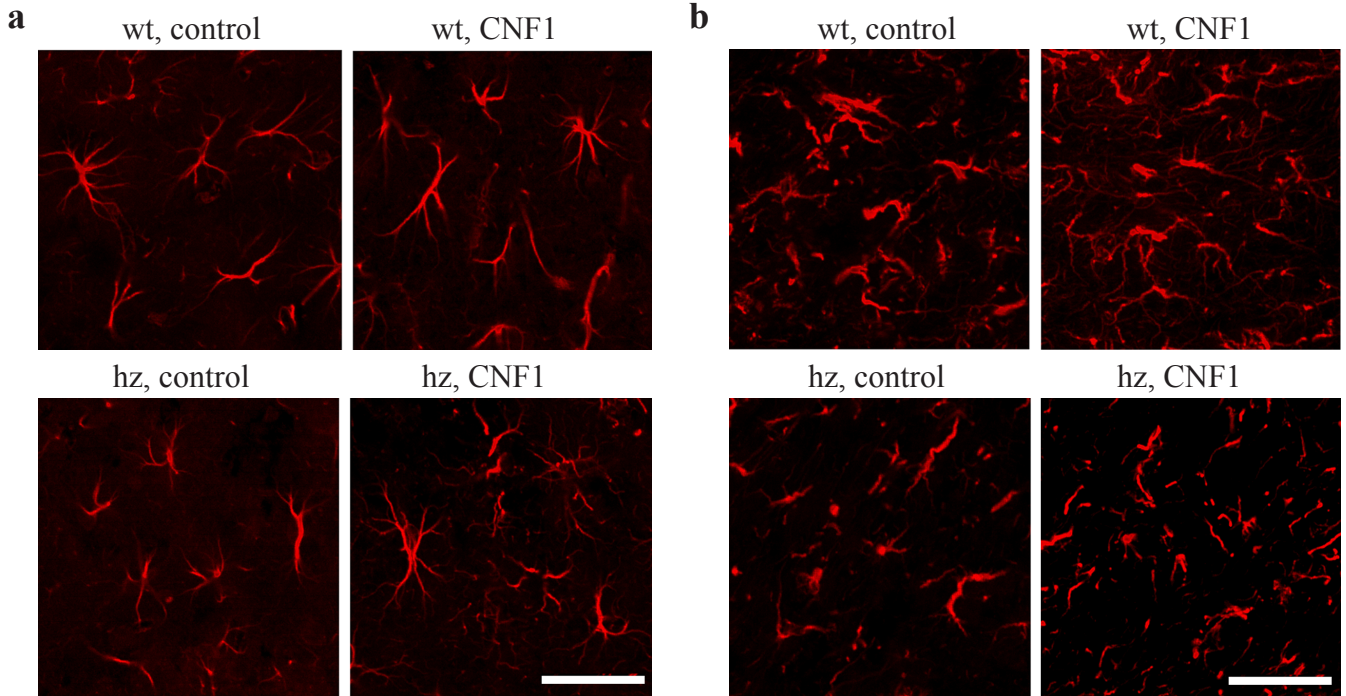

**Figure S4** High magnification of astrocytic cells in the dentate gyrus (a) and corpus callosum (b). The decrease in GFAP-immunoreactivity of astrocytes in MeCP2-308 hemizygous (hz) mice is counteracted by CNF1 treatment.
