# Supplementary material
Source: PubMed Central journal article supplement (PMC3306877)
Supplement: npp2011301x5.pdf [file npp2011301x5.pdf]

**Supplementary Table 1** *No differences were detected among groups in water T2 values*

**Supplementary Table 2** *CNF1 significantly contrasted NAA metabolism abnormalities in the hippocampus of MeCP2-308 mice*

## SUPPLEMENTARY TABLES

**Table S1** *No differences were detected among groups in water T2 values*

|            | T2 in Striatum | T2 in Hippocampus |
|------------|----------------|-------------------|
| wt control | 67.2 ± 1.4     | 57.9 ± 1.7        |
| wt CNF1    | 63.5 ± 1.6     | 59.3 ± 0.5        |
| hz control | 65.6 ± 2.5     | 58.0 ± 0.3        |
| hz CNF1    | 64.1 ± 1.3     | 59.2 ± 1.1        |

Data are means (ms) ± SEM. CNF1 C866S was used as a control.

**Table S2** *CNF1 significantly contrasted NAA metabolism abnormalities in the hippocampus of MeCP2-308 mice*

|            | Cr/PCr <sup>£</sup> | Gln/Glu   | NAA/Total NAA <sup>\$</sup> |
|------------|---------------------|-----------|-----------------------------|
| wt control | 0.5 ± 0.2           | 1.0 ± 0.2 | 0.86 ± 0.02                 |
| wt CNF1    | 0.2 ± 0.1           | 0.9 ± 0.2 | 0.89 ± 0.03                 |
| hz control | 0.8 ± 0.5           | 0.8 ± 0.2 | 0.94 ± 0.02                 |
| hz CNF1    | 0.2 ± 0.1           | 0.7 ± 0.1 | 0.84 ± 0.03                 |

Cr, Creatine; PCr, phosphocreatine; Gln, glutamine; Glu, glutamate; NAA, Nacetylaspartate; NAAG, Nacetylaspartylglutamate. Effect of treatment: <sup>£</sup>p = .06; Genotype\*treatment interaction: <sup>\$</sup>p < .05. CNF1 C866S was used as a control. Data are means (mM) ± SEM.
