# Supplementary material
Source: PubMed Central journal article supplement (PMC3306877)

**SUPPLEMENTARY FIGURE 1**

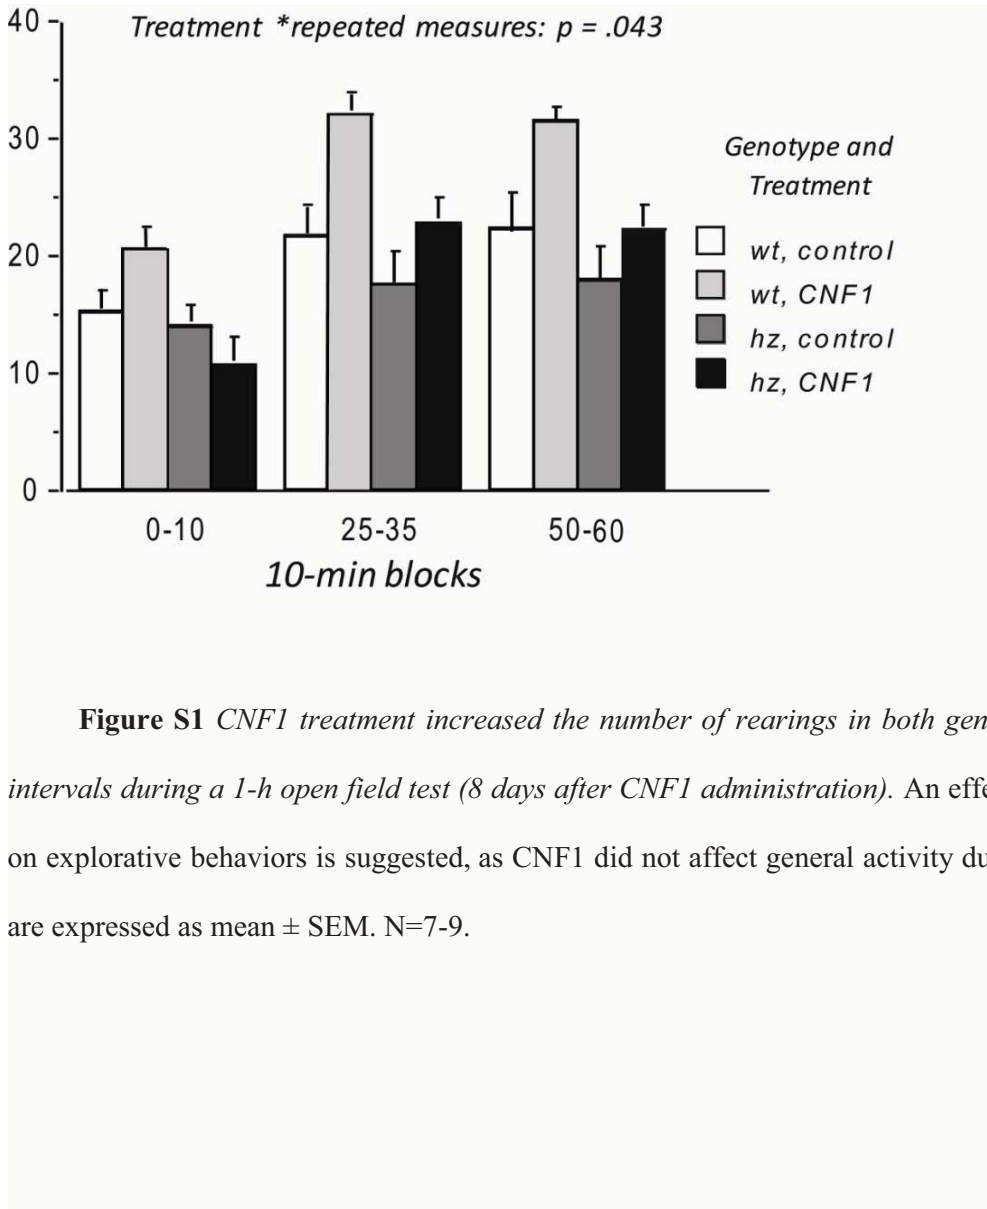

Supplement: npp2011301x1.pdf [file npp2011301x1.pdf]
